# Supplementary material for: Molecular Determinants for Recognition of Divergent SAMHD1 Proteins by the Lentiviral Accessory Protein Vpx
Source: PubMed Central journal article supplement (PMC4400269; doi:10.1016/j.chom.2015.03.004), 2015-04-08
Supplement: mmc1.pdf [file mmc1.pdf]

Cell Host & Microbe, Volume 17

**Supplemental Information**

**Molecular Determinants for Recognition  
of Divergent SAMHD1 Proteins**

**by the Lentiviral Accessory Protein Vpx**

David Schwefel, Virginie C. Boucherit, Evangelos Christodoulou, Philip A. Walker,  
Jonathan P. Stoye, Kate N. Bishop, and Ian A. Taylor

**Molecular determinants for recognition of divergent SAMHD1 proteins by the lentiviral accessory protein Vpx.**

**INVENTORY OF SUPPLEMENTAL INFORMATION**

ITEM 1) **Figure S1.** Western blot analysis of expression and primary FACS data for SAMHD1 degran assay. Panel **A** of this item shows the level of expression of each SAMHD1 degran used in the study. Panel **B** shows the primary FACS data from individual degran assays. Both **A** and **B** are associated with Figures 1, 4, 5 and 6 in the main article.

ITEM 2) **Figure S2.** Experimental electron density for each component of the  $SIV_{mnd-2}$  Vpx/SAMHD<sub>mnd</sub>-NtD/DCAF1-CtD ternary complex. This item shows the quality of the maps used to build the structure presented in the paper and is associated with Table 1 and Figures 2-6 in the main article.

ITEM 3) **Figure S3.** Zinc ion co-ordination of Vpx  $SIV_{mnd-2}$  and Vpx  $SIV_{smm}$ . This item shows the details of the co-ordinated zinc ions bound in the Vpx  $SIV_{mnd-2}$  and Vpx  $SIV_{smm}$  structures. It is associated with Figure 2 in the main article.

ITEM 4) **Figure S4.** Superposition of Vpx  $SIV_{mnd-2}$  and Vpx  $SIV_{smm}$  ternary complexes. This item shows the structural overlap between Vpx  $SIV_{mnd-2}$  and Vpx  $SIV_{smm}$  at the DCAF1 interface. This alignment facilitates a comparison of the common interactions and is associated with Figure 3 of the main article.

ITEM 5) **Figure S5.** Multiple sequence alignment of Vpx and Vpr proteins. This alignment in combination with Vpx  $SIV_{mnd-2}$  and Vpx  $SIV_{smm}$  structures shows all the conserved and variable regions found in the different Vpx and Vpr lineages and is associated with Figure 3 and 6 of the main article.

ITEM 6) **Figure S6.** SAMHD1 multiple sequence alignment. This alignment shows the sequence conservation in SAMHD1 NtD and CtD degron regions and highlights the residues making contacts at the Vpx interface. It is associated with Figure 5 and 6 of the main article.

**ITEM 7) Supplemental Figure legends.** Detailed legends for Supplemental Figures S1-S6.

ITEM 8) **Supplemental Table S1A-C.** These tables provide a list of all the interactions observed in the  $SIV_{\text{mnd-2}}$  Vpx/SAMHD<sub>mnd</sub>-NtD/DCAF1-CtD ternary complex and are associated Figures 3-6 of the main article.

#### **ITEM 9) SUPPLEMENTAL EXPERIMENTAL PROCEDURES**

This item provides detailed methods to supplement the experimental procedures reported in the paper.

#### **ITEM 10) SUPPLEMENTAL REFERENCES**

This item contains the full references that are cited Supplemental Experimental Procedures

Figure S1

A

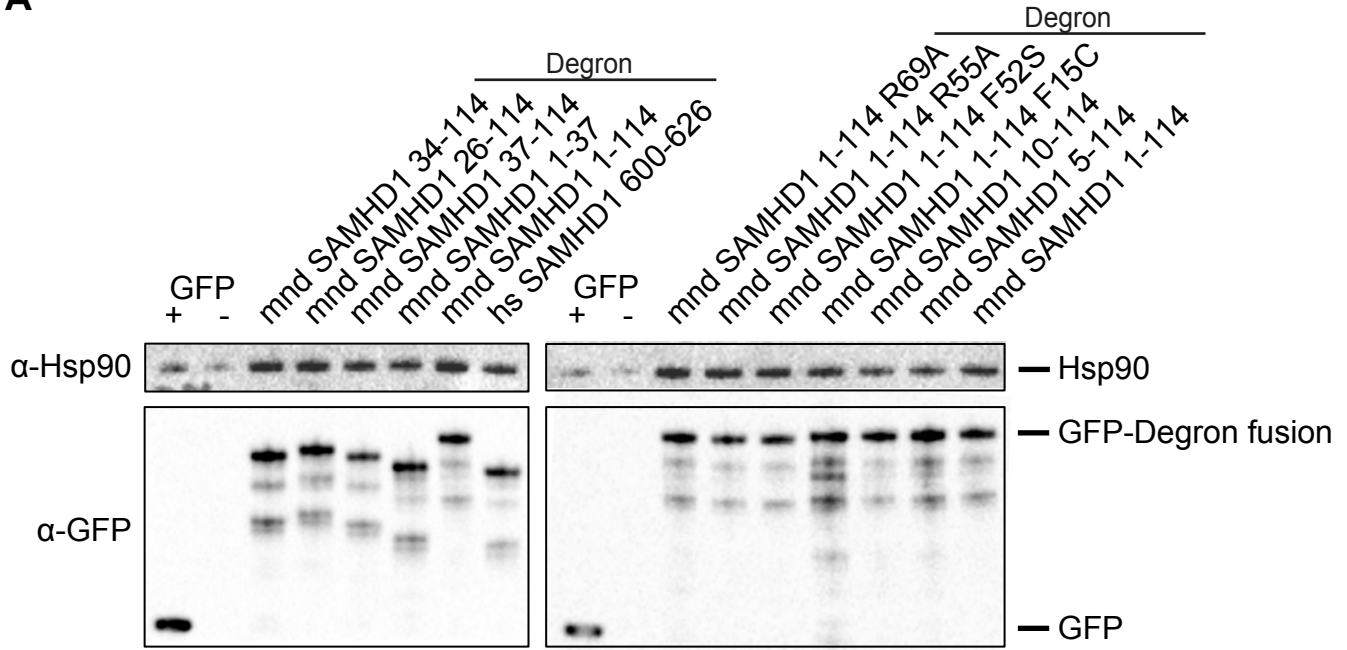

B

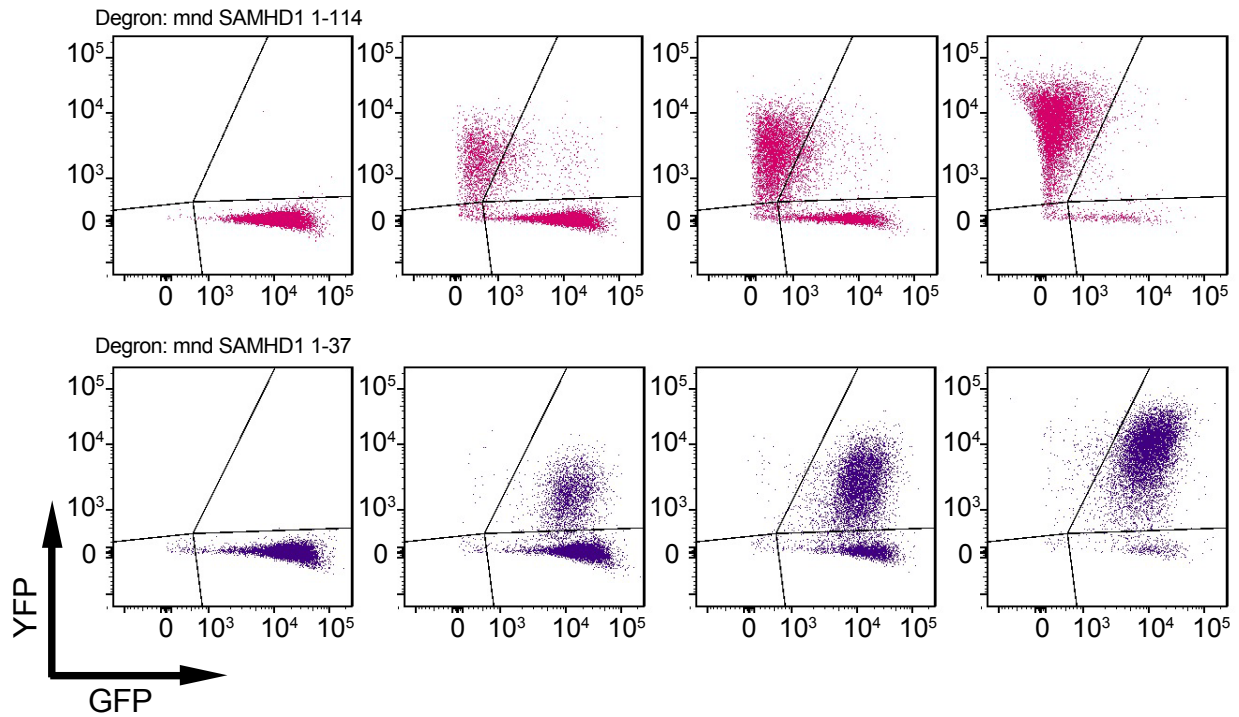



## Figure S2

DCAF1-CtD

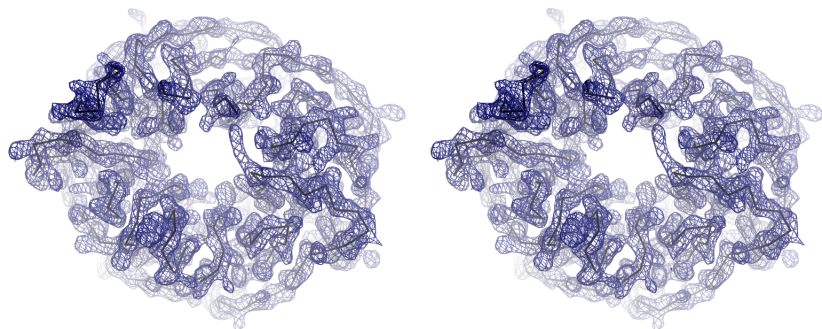

SIV<sub>mnd-2</sub> Vpx

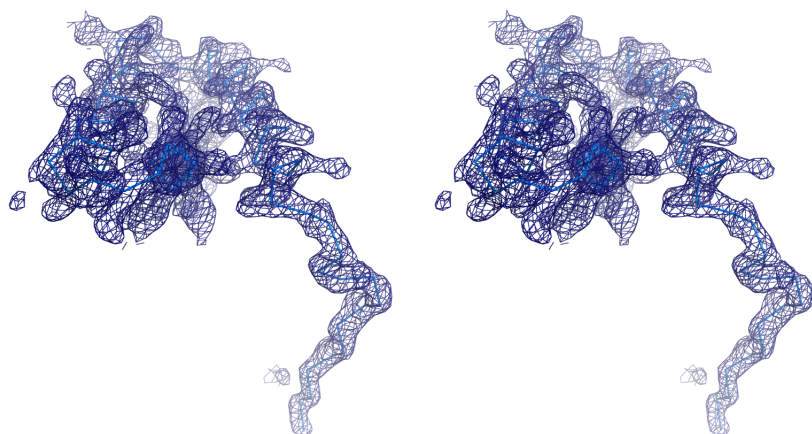

SAMHD1<sub>mnd</sub> 1-114

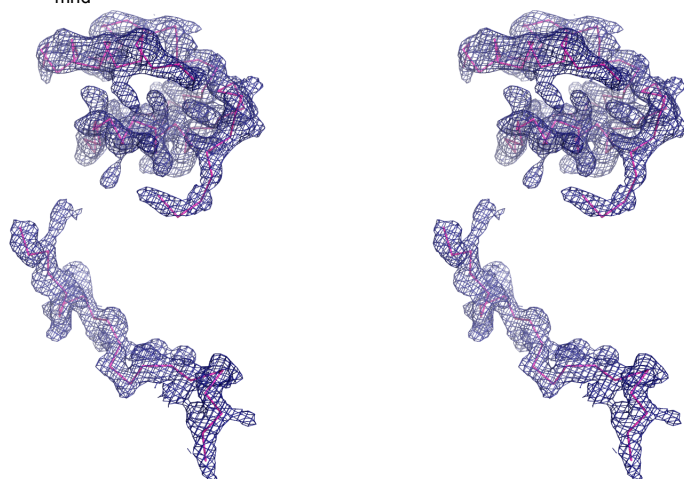

Figure S3

A

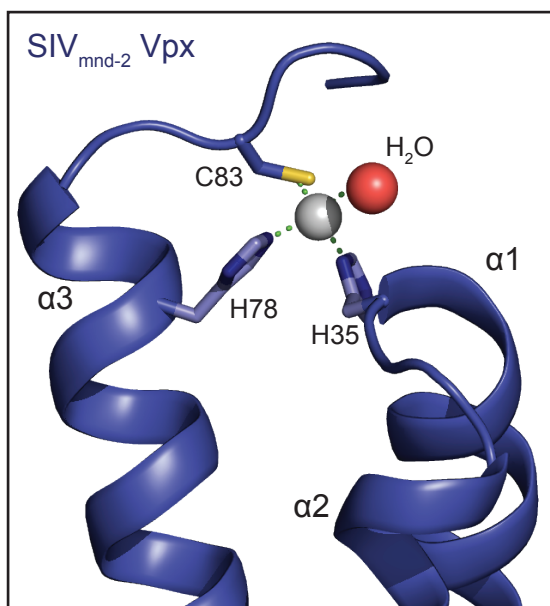

B

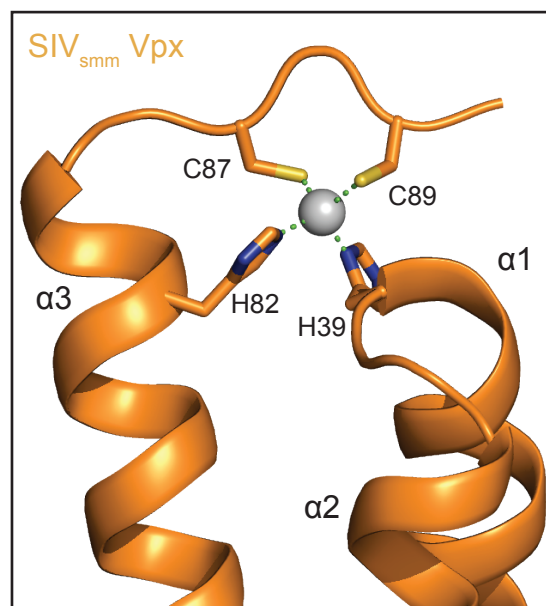

Figure S4

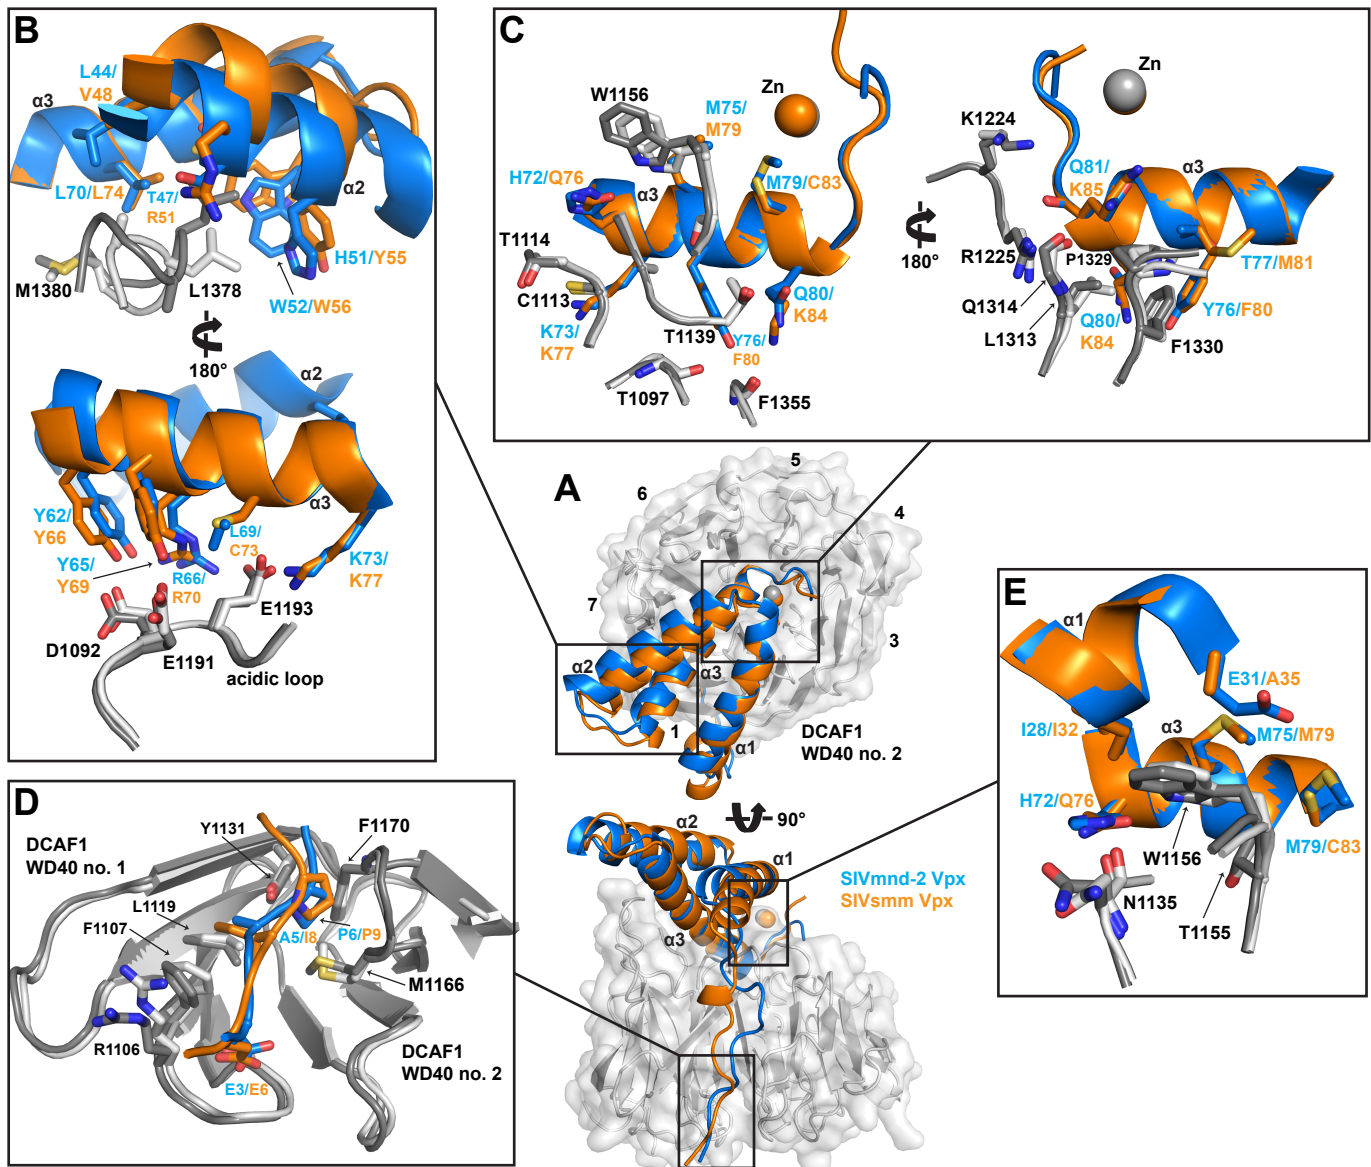

Figure S5

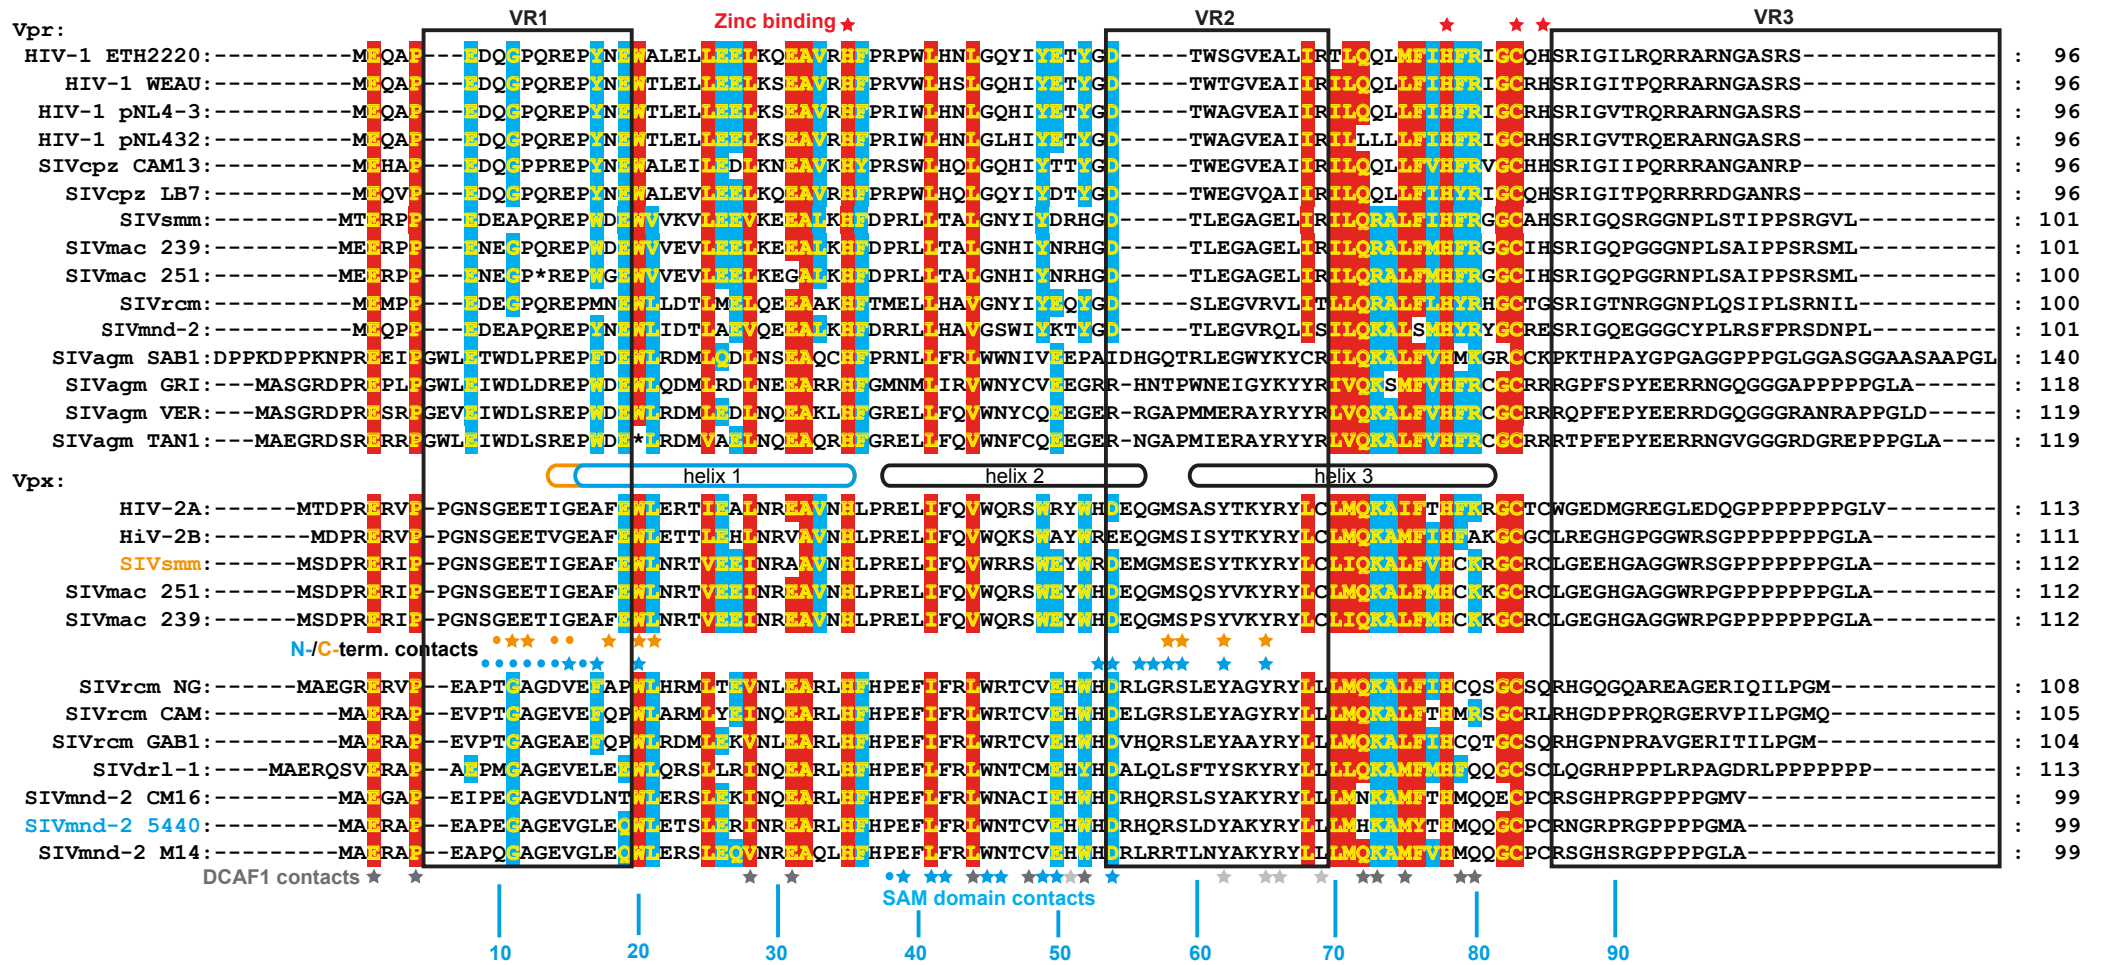



Figure S6

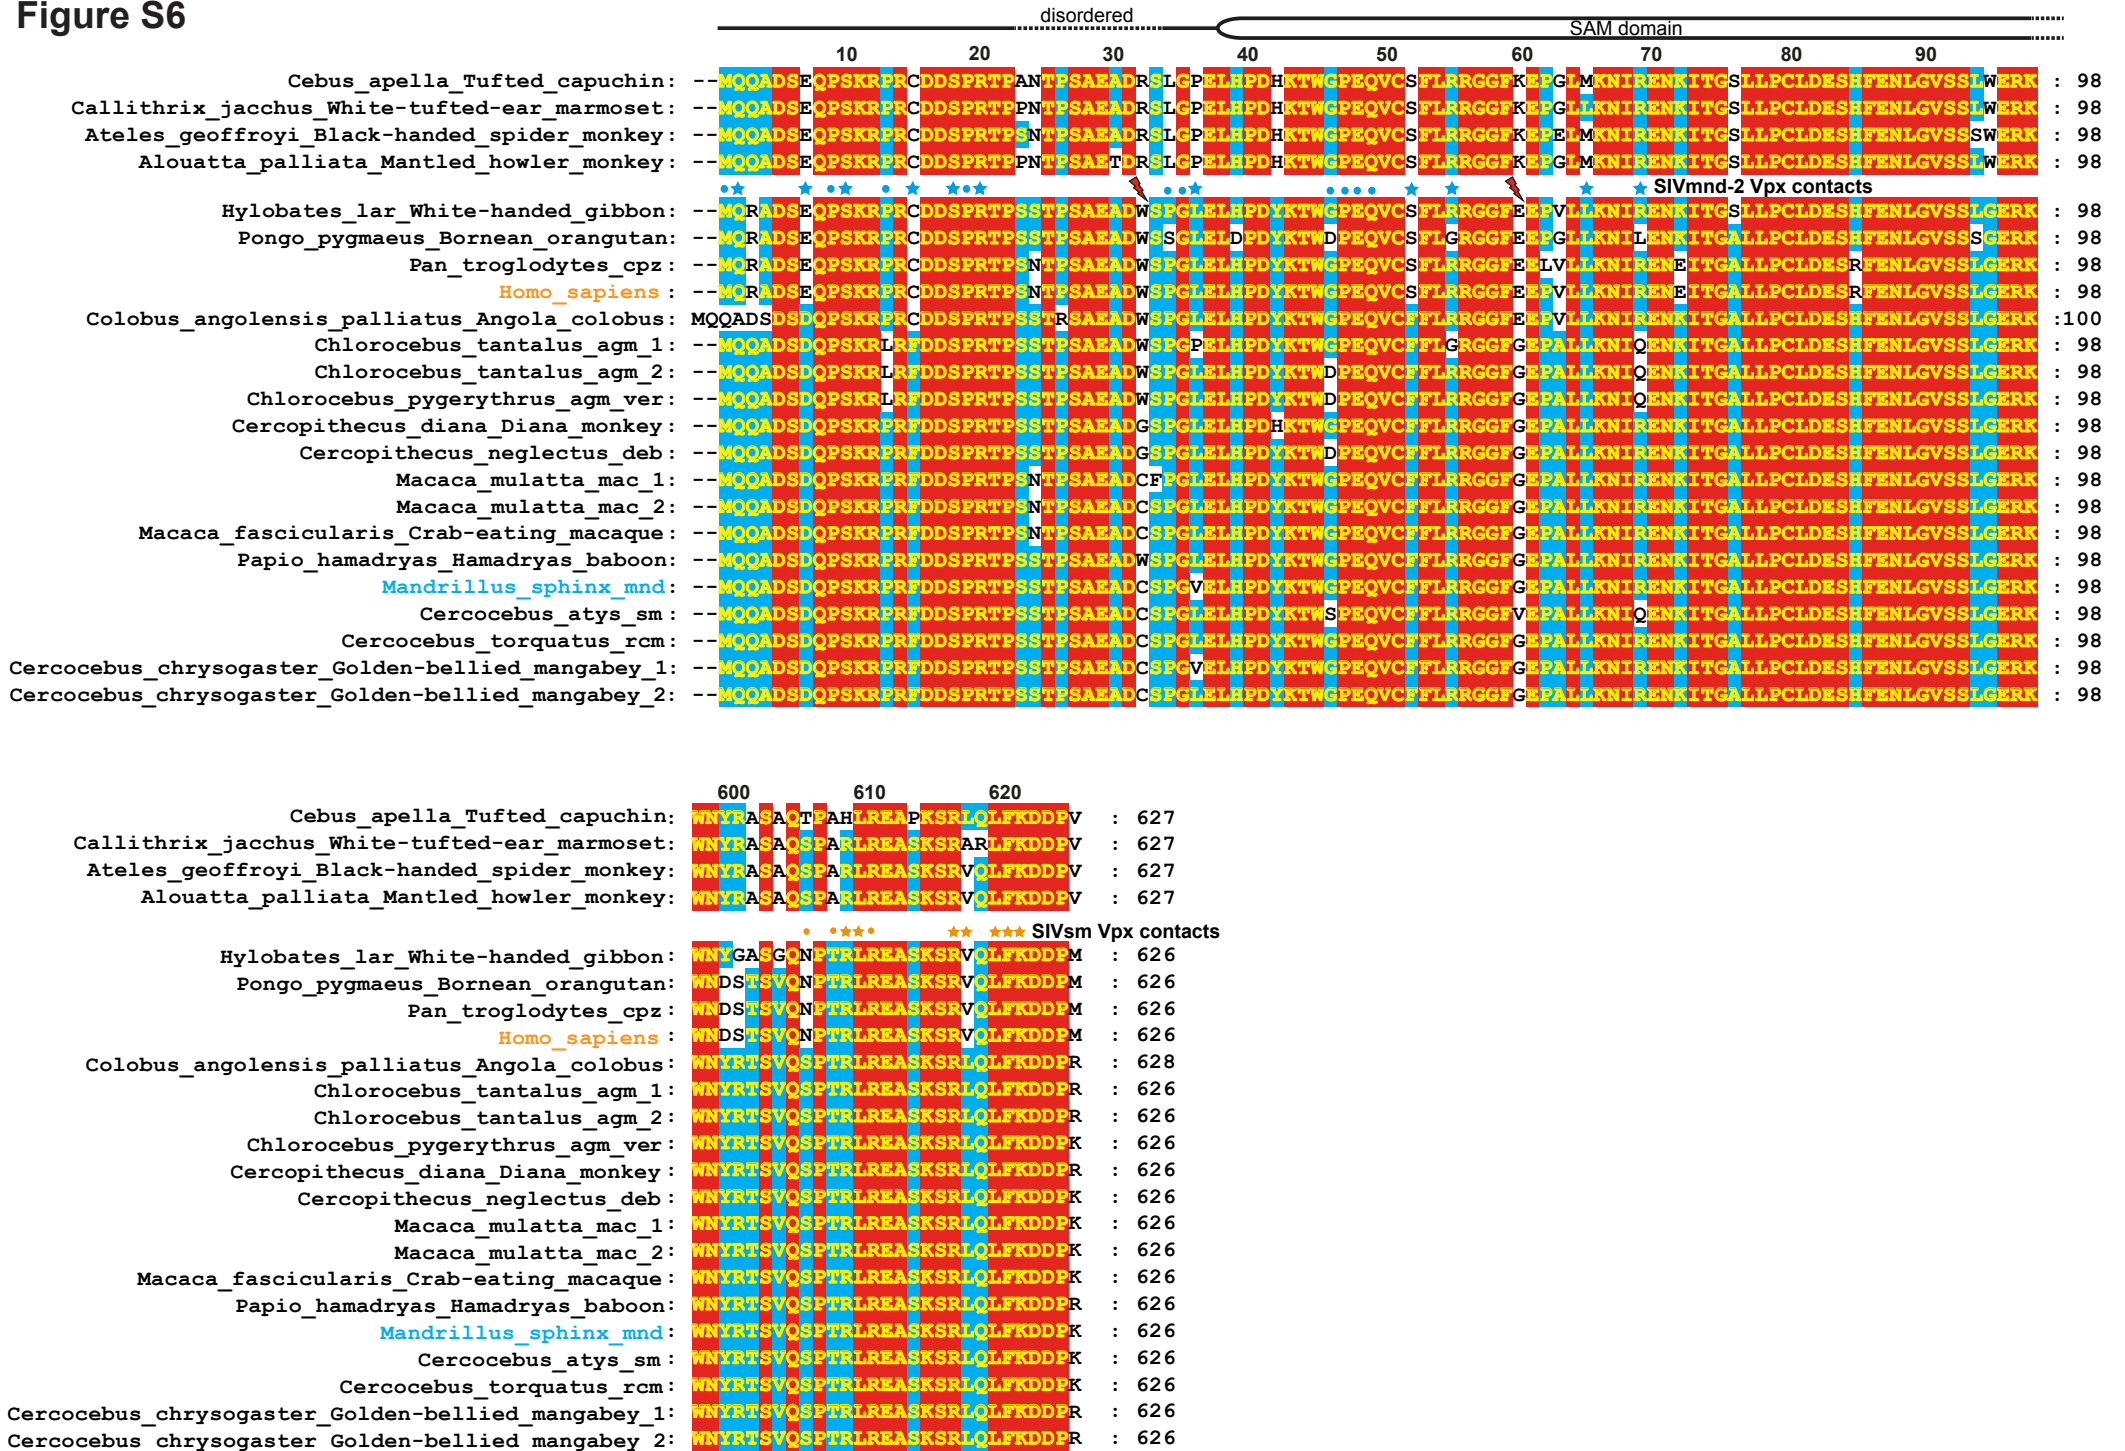

## SUPPLEMENTAL FIGURE LEGENDS

**Figure S1, related to Figure 1. Degron fusion proteins.** (A) Expression of (NLS)-GFP-degron fusion proteins in was assessed *M. dunnii* cells by Western blotting. For each construct the top panel shows an anti-Hsp90 blot loading control. In the lower panels an anti-GFP antibody was used to detect the expression level of each degron fusion indicated. (B) Primary FACS data for degron assays. Stable cell lines expressing degrons containing SAMHD1<sub>mnd</sub> residues 1-114 (upper panels, magenta) or 1-37 (lower panels, purple) were transduced with increasing SIV<sub>mnd-2</sub> Vpx (left to right) and analysed by flow cytometry.

**Figure S2, related to Figure 2. Electron density.** Stereo image of  $(2F_{\text{obs}} - F_c)$  refined electron density for DCAF1 (top), Vpx (middle) and SAMHD1 (bottom) contoured at  $1 \sigma$ . The density is shown as light blue wireframe and the backbone C $\alpha$  traces of the final refined models as ribbon representation.

**Figure S3, related to Figure 2. Vpx conservation of zinc coordination.** The protein backbones of (A) Vpx from SIV<sub>mnd-2</sub> (blue) and (B) SIV<sub>smm</sub> (orange) are shown in cartoon representation,  $\alpha$ -helices are labelled and zinc ions are shown as grey spheres. Residues that co-ordinate zinc ions are shown as sticks, the coordinating water molecule in SIV<sub>mnd-2</sub> Vpx as a red sphere and co-ordinating bonds as dashed lines.

**Figure S4, related to Figure 3. Superposition of DCAF1-CtD-Vpx complexes.** (A) Overview of structurally aligned Vpx/DCAF1-CtD complexes. The orientation is as in **Figure 3**. Bound Vpx molecules are shown in cartoon representation, SIV<sub>mnd-2</sub> Vpx (blue) and SIV<sub>smm</sub> Vpx

(orange). **(B-E)** Details of Vpx/DCAF1-CtD interactions in the regions boxed in **a**. Residues that make interactions are shown in stick representation, the DCAF1-CtD cartoon is coloured white, in the SIV<sub>mnd-2</sub> and grey in the SIV<sub>smm</sub> complexes.

**Figure S5, related to Figure 3 and Figure 6. Multiple sequence alignment of HIV/SIV Vpx and Vpr proteins.** 90% type-conserved amino acid residues are highlighted in red, 60% type-conserved in cyan, variable regions are boxed and the position of secondary structure elements is displayed between the Vpr and Vpx groupings. Red stars above the alignment indicate zinc-binding side chains. Residues that interact with SAMHD1 degrons are indicated with blue (SIV<sub>mnd-2</sub>) or orange (SIV<sub>smm</sub>) stars (side chain) or dots (backbone). Grey stars indicate Vpx residues with side chains that interact with DCAF1. Darker shading is applied to those that are also type-conserved in Vpr. Numbering below is for SIV<sub>mnd-2</sub> 5440 Vpx.

**Figure S6, related to Figure 5 and Figure 6. Multiple sequence alignment of primate SAMHD1 N- and C-terminal regions.** 100% type-conserved amino acid residues are highlighted in red, 60% type-conserved in cyan. SAMHD1 residues that interact with the respective Vpx are indicated with blue (SIV<sub>mnd-2</sub>) or orange (SIV<sub>smm</sub>) stars (side chain) or dots (backbone). Flashes indicate the highly divergent residues 32 and 60.

**Table S1A related to Figure 3. Vpx-DCAF1 Interface residues (1595 Å<sup>2</sup>)**

| Vpx residue       | Region | Interaction | DCAF1 residue       | Region   |
|-------------------|--------|-------------|---------------------|----------|
| A2 <sub>MC</sub>  | Nt     | HB          | R1106               | WD40 1   |
| E3 <sub>MC</sub>  | Nt     | HB          | R1106               | WD40 1   |
| E3                | Nt     | HB          | R1106 <sub>MC</sub> | WD40 1   |
| E3                | Nt     | HB          | S1102               | WD40 1   |
| E3                | Nt     | HI          | R1106, F1107        | WD40 1   |
| A5                | Nt     | HI          | F1107, L1119        | WD40 1   |
| P6                | Nt     | HB          | Y1131               | WD40 1   |
| P6                | Nt     | HI          | Y1131               | WD40 1   |
| P6                | Nt     | HI          | M1166, F1170        | WD40 2   |
| E7 <sub>MC</sub>  | Nt     | HB          | S1168 <sub>MC</sub> | WD40 2   |
| E7 <sub>MC</sub>  | Nt     | HB          | F1170 <sub>MC</sub> | WD40 2   |
| I28               | α1     | HI          | W1156               | WD40 2   |
| E31               | α1     | HI          | W1156               | WD40 2   |
| L44               | α2     | HI          | A1377               | WD40 7   |
| T47               | α2     | HI          | L1378               | WD40 7   |
| C48               | α2     | HI          | L1378               | WD40 7   |
| H51               | α2     | HI          | L1378               | WD40 7   |
| C52               | α2     | HI          | L1378               | WD40 7   |
| Y62               | α3     | HB          | D1092               | WD40 7/1 |
| Y65               | α3     | HB          | E1091               | WD40 7/1 |
| R66               | α3     | SB          | E1093               | WD40 7/1 |
| L68               | α3     | HI          | T1114               | WD40 1   |
| L69               | α3     | HI          | C1113, T1114        | WD40 1   |
| L70               | α3     | HI          | A1377, L1378, M1380 | WD40 7   |
| H72               | α3     | HB          | N1135 <sub>MC</sub> | WD40 1/2 |
| H72               | α3     | HI          | C1113, T1114        | WD40 1   |
| K73               | α3     | SB          | E1093               | WD40 7/1 |
| K73               | α3     | HB          | S1094 <sub>MC</sub> | WD40 7/1 |
| K73               | α3     | HI          | C1113               | WD40 1   |
| M75               | α3     | HI          | W1156               | WD40 2   |
| Y76               | α3     | HB          | T1097 <sub>MC</sub> | WD40 1   |
| Y76               | α3     | HB          | F1355 <sub>MC</sub> | WD40 7   |
| Y76               | α3     | HI          | A1137, T1139        | WD40 1/2 |
| Y76               | α3     | HI          | F1330               | WD40 6   |
| T77               | α3     | HI          | P1329, F1330        | WD40 6   |
| M79               | α3     | HI          | T1155, W1156        | WD40 2   |
| Q81               | α3     | HB          | Q1314 <sub>MC</sub> | WD40 6   |
| Q81 <sub>MC</sub> | α3     | HB          | R1225               | WD40 4   |
| Q81               | α3     | HI          | L1313, P1329        | WD40 6   |

HB – hydrogen bond, HI – hydrophobic interaction, SB – salt bridge MC – mainchain



**Table S1B, related to Figure 3. DCAF1-SAMHD1 interface residues (499 Å<sup>2</sup>)**

| DCAF1 residue              | Region   | Type of contact | SAMHD1 residue       | Region |
|----------------------------|----------|-----------------|----------------------|--------|
| A1089 <sub>MC</sub>        | WD40 7/1 | HB              | R14                  | Nt     |
| N1090                      | WD40 7/1 | HI              | R12                  | Nt     |
| E1091                      | WD40 7/1 | SB              | R12                  | Nt     |
| D1092                      | WD40 7/1 | SB              | R14                  | Nt     |
| T1114, T1114 <sub>MC</sub> | WD40 1   | HB              | Q8                   | Nt     |
| Q1116                      | WD40 1   | HI              | Q8, R12              | Nt     |
| N1132                      | WD40 1/2 | HB              | D7, Q8 <sub>MC</sub> | Nt     |
| H1134 <sub>MC</sub>        | WD40 1/2 | HB              | Q8                   | Nt     |
| N1135                      | WD40 1/2 | HB              | D5 <sub>MC</sub>     | Nt     |

HB – hydrogen bond, HI – hydrophobic interaction, SB – salt bridge MC – mainchain

**Table S1C, related to Figure 3. Vpx-SAMHD1 Interface residues (1334 Å<sup>2</sup>)**

| Vpx residue       | Region      | Interaction | SAMHD1 residue                                            | Region     |
|-------------------|-------------|-------------|-----------------------------------------------------------|------------|
| P9                | Nt          | HI          | M1, Q2                                                    | Nt         |
| Q10 <sub>MC</sub> | Nt          | HB          | M1 <sub>MC</sub> , Q2 <sub>MC</sub>                       | Nt         |
| G11               | Nt          | HI          | Q2                                                        | Nt         |
| A12               | Nt          | HI          | Q2                                                        | Nt         |
| G13               | Nt          | HB          | D7, S10, S10 <sub>MC</sub>                                | Nt         |
| E14 <sub>MC</sub> | Nt          | HB          | D7                                                        | Nt         |
| V15 <sub>MC</sub> | Nt          | HB          | D7                                                        | Nt         |
| V15               | Nt          | HI          | D7, P9                                                    | Nt         |
| L17               | α1          | HI          | P9, P13                                                   | Nt         |
| W20               | α1          | HI          | Q8, P9                                                    | Nt         |
| N29               | α1          | HI          | V36                                                       | Nt         |
| E39               | α2          | HB          | P47 <sub>MC</sub> , E48 <sub>MC</sub> , Q49 <sub>MC</sub> | SAM domain |
| L41               | α2          | HI          | V36                                                       | Nt         |
| F42               | α2          | HI          | L38, Q49, F52                                             | SAM domain |
| W45               | α2          | HI          | P34                                                       | Nt         |
| N46               | α2          | HB          | E48, E48 <sub>MC</sub>                                    | SAM domain |
| V49               | α2          | HI          | R55                                                       | SAM domain |
| E50               | α2          | SB          | R69                                                       | SAM domain |
| H53               | α2          | HI          | R20                                                       | Nt         |
| D54               | α2          | SB          | R20                                                       | Nt         |
| D54               | α2          | SB          | R55                                                       | SAM domain |
| H56               | α2          | HI          | F15                                                       | Nt         |
| Q57               | α2/ α3 loop | HB          | R20                                                       | Nt         |
| Q57 <sub>MC</sub> | α2/ α3 loop | HB          | R20 <sub>MC</sub>                                         | Nt         |
| R58               | α2/ α3 loop | HI          | F15                                                       | Nt         |
| R58               | α2/ α3 loop | HB          | F15 <sub>MC</sub>                                         | Nt         |
| S59 <sub>MC</sub> | α2/ α3 loop | HB          | S18 <sub>MC</sub>                                         | Nt         |
| Y62               | α3          | HI          | F15, S18                                                  | Nt         |
| Y65               | α3          | HI          | P13                                                       | Nt         |
| Y65               | α3          | HB          | R12                                                       | Nt         |

HB – hydrogen bond, HI – hydrophobic interaction, SB – salt bridge MC – mainchain

## SUPPLEMENTAL EXPERIMENTAL PROCEDURES

### *Degron assay*

Degron reporter constructs comprising two copies of Nuclear Localisation Signal (NLS)-EGFP fused to N-terminal sequences from SAMHD1<sub>mand</sub> (NLS-EGFP-SAMHD1<sub>mand</sub>-NtD) were generated by replacing the human SAMHD1-CtD degron sequence in pCMS28-NLS-EGFP-SAMHD1-CtD (Schwefel et al., 2014) with sequences from the N-terminal region of SAMHD1<sub>mand</sub>. DNA coding for residues 1-114, 1-37, 37-114, 5-114 or 10-114 was amplified by PCR and inserted into the reporter construct using XhoI/EcoRI restriction sites. Point mutations were created by PCR-based site directed mutagenesis. Virus-like particles (VLPs) were generated by co-transfecting 293T cells with pVSVG, pKB4 and pCMS28-NLS-EGFP-SAMHD1 human-CtD or mandrill-NtD, wildtype or mutant (Schwefel et al., 2014). Stable cell lines were produced by transduction of *Mus dunni* cells followed by puromycin selection. Expression of degron constructs was assessed using Western blotting with anti-EGFP antibodies.

The SIV<sub>smm</sub> Vpx sequence was amplified by PCR from pIRES2-EGFP-Vpx (a gift from Mario Stevenson), and SIV<sub>mand-2</sub> Vpx was amplified from the PET49 plasmid used for *E. coli* expression. Sequences were inserted into pENTR/D/TOPO (Invitrogen) and transferred into pLgatewayIeYFP (Gateway LR clonase<sup>TM</sup> II, Invitrogen) to create bicistronic Vpx-IRES-YFP expression constructs. Point mutations were created by PCR-based site directed mutagenesis. VLPs expressing Vpx-IRES-YFP were generated by co-transfecting 293T cells with pVSV-G, pKB4 and pLgatewayIeYFP-Vpx (wildtype or mutants) (Schwefel et al., 2014). Approximately 18 hours after transfection, cells were washed and sodium butyrate medium (0.02 M sodium butyrate, 10% FCS and 1% penicillin/streptomycin in DMEM) was added for 6 hours before

replacing with fresh media. After a further 15 hours VLPs were harvested from the media by filtration.

Parental *Mus dunni* or stable cell lines expressing degron reporters were seeded at  $5 \times 10^4$  cells per well in a 24-well plate one day prior to infection. Cells were infected with 2-fold serial dilutions of Vpx-YFP VLPs in the presence of  $1 \mu\text{g/mL}$  Polybrene. After 48 hours, cells were harvested and the percentage of EGFP-positive and YFP-positive cells was determined by flow cytometry using a FACSVerser analyser (BD Biosciences).

### *Protein expression and purification*

The nucleotide sequences coding for SIV<sub>mind-2</sub> Vpx isolate 5440 (Hu et al., 2003) and amino acid residues 1-114 of SAMHD1<sub>mind</sub> (Uniprot ID H6WEA4) were synthesised codon-optimised for *E. coli* (Life Technologies). The open reading frames were inserted into pET-49b and pET-52b (Merck Millipore) expression plasmids respectively using flanking XmaI/NotI restriction sites to generate N-terminally GST-tagged and N-terminally Strep-II-tagged fusion proteins. DCAF1-CtD was cloned and expressed as described previously (Schwefel et al., 2014).

SIV<sub>mind-2</sub> Vpx and SAMHD1<sub>mind</sub>-NtD were expressed in the *E. coli* strain Rosetta 2 (DE3) (Merck Millipore). Bacterial cultures were grown in terrific broth medium in a shaking incubator at 37 °C. Protein expression was induced by the addition of 0.1 mM IPTG at  $A_{600} = 0.5$ , then further incubated at 18 °C for 20 hours to express recombinant proteins. Cells were harvested by centrifugation for 20 min at 4,500 xg and 4 °C, the cell pellets resuspended in 30 mL lysis buffer (50 mM Tris-HCl pH 7.8, 500 mM NaCl, 4 mM MgCl<sub>2</sub>, 0.5 mM TCEP, 1x EDTA-free mini complete protease inhibitors (Roche), 0.1 U/ml Benzonase (Novagen) per pellet of 1 L bacteria culture and stored at -20 °C.

SAMHD1<sub>mnt</sub>-NtD cell suspensions were lysed by disruption using an EmulsiFlex-C5 homogeniser (Avestin). The lysate was cleared by centrifugation for 1 hour at 48,000 xg at 4 °C. All further purification steps were performed at 4 °C or on ice. Lysates were applied to 10 mL StrepTactin column (IBA). The column was washed with 600 mL of Wash buffer (50 mM Tris-HCl pH 7.8, 500 mM NaCl, 4 mM MgCl<sub>2</sub>, 0.5 mM TCEP) and bound proteins were eluted in wash buffer containing 2.5 mM d-desthiobiotin. Eluted fractions were concentrated to 5 mL and further purified on a Superdex75 gel filtration column (GE Healthcare) equilibrated in Gel filtration buffer (10 mM Tris-HCl pH 7.8, 150 mM NaCl, 4 mM MgCl<sub>2</sub>, 0.5 mM TCEP). Peak fractions containing SAMHD1<sub>mnt</sub>-NtD were pooled, concentrated to 30 mg/mL, snap-frozen in liquid nitrogen in small aliquots and stored at -80 °C.

#### *Protein complex assembly*

Cell suspension from 1 L of GST-SIV<sub>mnt-2</sub> Vpx was lysed by homogenisation in an EmulsiFlex-C5 (Avestin). The lysate was cleared by centrifugation for 1 h at 48,000 xg at 4 °C. All further purification steps were performed at 4 °C or on ice. 1 mL of glutathione Sepharose (GSH-Sepharose) beads (GE Healthcare) were added to the lysate and incubated for 1 hour on a roller agitator. Beads were pelleted by centrifugation at 4000 xg for 10 min, the supernatant was discarded and the beads washed four times with 50 mL of Wash buffer. For assembly, the GST-SIV<sub>mnt-2</sub> Vpx bound beads were resuspended in 10 mL wash buffer in a 15 mL Falcon tube. 1 mg of DCAF1-CtD together with an equimolar amount of SAMHD1<sub>mnt</sub>-NtD and 1 mg of HRV-3C protease (GE Healthcare) were added and the tube was incubated overnight on a rolling agitator. Beads were then removed by centrifugation at 4000 xg for 10 min. The supernatant was concentrated to 5 mL and applied to a Superdex200 size exclusion column equilibrated in Gel

filtration buffer. Peak fractions containing the ternary complex were pooled, concentrated to 12 mg/mL, snap-frozen in liquid nitrogen in small aliquots and stored at -80 °C.

### *Crystallization and data collection*

Crystals of the SIV<sub>mnd-2</sub> Vpx/SAMHD1<sub>mnd</sub>-NtD/DCAF1CtD complex were grown using the hanging drop vapour diffusion method by mixing 1  $\mu$ L complex at a concentration of 6.34 mg/mL with 1  $\mu$ L of reservoir solution containing 0.16 M Trisodium Citrate-HCl pH 5.2 and 4% PEG 6000. Drops were equilibrated over a 450  $\mu$ L reservoir solution at 18 °C. Crystals were adjusted to 25 % glycerol and cryo-cooled in liquid nitrogen. A data set from a single crystal was collected on station I04 at the Diamond synchrotron light source, UK at a wavelength of 0.97965 Å.

### *Structure solution*

Diffraction data were reduced with the program XDS (Kabsch, 2010). The high resolution cut-off was based on the  $CC_{1/2}$  criteria (Karplus and Diederichs, 2012). The structure was solved by molecular replacement with the program Molrep (Vagin and Teplyakov, 2010) using the previously determined DCAF1-CtD structure and a homology model constructed with the previously determined SIV<sub>smm</sub> Vpx as template (PDB code 4CC9 (Schwefel et al., 2014)). The SAM domain was placed manually into density using the NMR structure of the human SAMHD1 SAM domain as guidance (PDB code 2E8O). Iterative model adjustment using the program Coot (Emsley et al., 2010) combined with positional, real-space, individual b-factor and TLS refinement with the program phenix.refine (Adams et al., 2010) produced a final model for DCAF1-CtD residues 1073-1315, 1327-1392 (chain A), SIV<sub>mnd-2</sub> Vpx residues 2-86 (chain B)

and SAMHD1<sub>mnd</sub>-NtD residues 1-22, 34-88, 93-109 (chain C) with R(R<sub>free</sub>)-factors of 17.5% (23.1%). 95.8% of all residues fall in the favoured region of the Ramachandran plot with 0.42% outliers. Data collection and refinement statistics are shown in Table 1.

### *Multiple sequence alignment*

Amino acid sequences were aligned using the ClustalW server and adjusted manually. NCBI accession numbers for Vpr sequences: HIV-1 ETH2220 - U46016, HIV-1 WEAU - U21135, HIV-1 pNL4-3 - AF324493, HIV-1 pNL432 - M28355, SIV<sub>smm</sub> - AF077017, SIV<sub>cpzCAM13</sub> - AY169968, SIV<sub>cpzLB7</sub> - DQ373064, SIV<sub>mac239</sub> - M33262, SIV<sub>mac251</sub> - M76764, SIV<sub>rcm</sub> - HM803689, SIV<sub>mnd-2</sub> - AF367411, SIV<sub>agmSAB1</sub> - U04005, SIV<sub>agmGRI</sub> - M66437, SIV<sub>agmVER</sub> - KF741091, SIV<sub>agmTAN1</sub> - U58991; for Vpx sequences: HIV-2A - M30502, HIV-2B - U27200, SIV<sub>smm</sub> - AF077017, SIV<sub>mac251</sub> - M76764, SIV<sub>mac239</sub> - M33262, SIV<sub>rcmNG</sub> - AF349680, SIV<sub>rcmCAM</sub> - HM803689, SIV<sub>rcmGAB1</sub> - AF382829, SIV<sub>drl-1</sub> - AY159321, SIV<sub>mnd-2CM16</sub> - AF367411, SIV<sub>mnd-25440</sub> - AY159322, SIV<sub>mnd-2M14</sub> - AF328295; for SAMHD1 sequences: *Cebus paella* - JN936910, *Callithrix jacchus* - JN936906, *Ateles geoffroyi* - JN936911, *Alouatta palliata* - JN936912, *Hylobates lar* - JN936889, *Pongo pygmaeus* - JN936888, *Pan troglodytes* - JN936887, *Homo sapiens* - BC036450, *Colobus angolensis* - JN936905, *Chlorocebus tantalus 1* - JN936891, *Chlorocebus tantalus 2* - JN936892, *Chlorocebus pygerythrus* - JQ231137, *Cercopithecus Diana* - JN936902, *Cercopithecus neglectus* - JQ231141, *Macaca mulatta 1* - JN936894, *Macaca mulatta 2* - JN936895, *Macaca fascicularis* - JN936893, *Papio hamadryas* - JN936890, *Mandrillus sphinx* - JN936897, *Cercocebus atys* - JQ231132, *Cercocebus torquatus* - JQ231133, *Cercocebus chrysogaster 1* - JN936898, *Cercocebus chrysogaster 2* - JN936899.

## SUPPLEMENTAL REFERENCES

- Adams, P.D., Afonine, P.V., Bunkoczi, G., Chen, V.B., Davis, I.W., Echols, N., Headd, J.J., Hung, L.W., Kapral, G.J., Grosse-Kunstleve, R.W., *et al.* (2010). PHENIX: a comprehensive Python-based system for macromolecular structure solution. *Acta crystallographica. Section D, Biological crystallography* 66, 213-221.
- Emsley, P., Lohkamp, B., Scott, W.G., and Cowtan, K. (2010). Features and development of Coot. *Acta crystallographica. Section D, Biological crystallography* 66, 486-501.
- Hu, J., Switzer, W.M., Foley, B.T., Robertson, D.L., Goeken, R.M., Korber, B.T., Hirsch, V.M., and Beer, B.E. (2003). Characterization and comparison of recombinant simian immunodeficiency virus from drill (*Mandrillus leucophaeus*) and mandrill (*Mandrillus sphinx*) isolates. *J Virol* 77, 4867-4880.
- Kabsch, W. (2010). Xds. *Acta crystallographica. Section D, Biological crystallography* 66, 125-132.
- Karplus, P.A., and Diederichs, K. (2012). Linking crystallographic model and data quality. *Science* 336, 1030-1033.
- Vagin, A., and Teplyakov, A. (2010). Molecular replacement with MOLREP. *Acta Crystallographica Section D* 66, 22-25.
